# Supplementary material for: Platelet closure time in the evaluation of efficacy of CAR-T cell therapy in relapsed/refractory multiple myeloma
Source: Research Square preprint supplement (doi:10.21203/rs.3.rs-2487838/v1), 2023-01-17
Supplement: Supplementary file 1 [file 933e736c09e2f6b7161832fc.docx]

**Supplemental Table 1. Characteristics of patients with R/R MM and product manufacture.**

| **Patient No.** | **Diagnosis** | **Gender** | **Age (year)** | **Number of previous therapies** | **Number of relapses** | **Time of enrollment (month)** | **Time of leukapherasis (day)** | **Lymphodepleting chemotherapy** | **Total CAR-T cells infused (×106/kg)** | **Severe CRS (Y/N)** | **ICAS**  **(Y/N)** | **Response** |
| --- | --- | --- | --- | --- | --- | --- | --- | --- | --- | --- | --- | --- |
| 1 | MM (relapsed) | Female | 57 | 4.00 | 2 | 24 | d-3 to -5 | FC | 2 | N | N | CR |
| 2 | MM (relapsed) | Male | 45 | 1.00 | 1 | 7 | d-3 to -5 | FC | 2 | N | Y | sCR |
| 3 | MM (relapsed) | Male | 53 | 2.00 | 1 | 7 | d-3 to -5 | FC | 1 | N | N | CR |
| 4 | MM (relapsed) | Male | 61 | 2.00 | 1 | 23 | d-3 to -5 | FC | 2 | N | N | PR |
| 5 | MM (relapsed) | Male | 66 | 4.00 | 1 | 36 | d-3 to -5 | FC | 2 | N | N | PR |
| 6 | MM (relapsed) | Male | 58 | 1.00 | 1 | 9 | d-3 to -5 | FC | 2 | N | N | VGPR |
| 7 | MM (relapsed) | Male | 49 | 6.00 | 2 | 30 | d-3 to -5 | FC | 2 | N | N | CR |
| 8 | MM (relapsed) | Male | 70 | 3.00 | 1 | 34 | d-3 to -5 | FC | 1 | N | N | CR |
| 9 | MM (refractory) | Male | 62 | 2.00 | / | 12 | d-3 to -5 | FC | 1 | N | N | CR |
| 10 | MM (relapsed) | Male | 56 | 2.00 | 1 | 120 | d-3 to -5 | FC | 1 | N | N | PR |
| 11 | MM (relapsed) | Male | 41 | 4.00 | 1 | 96 | d-3 to -5 | FC | 2 | N | N | sCR |
| 12 | MM (relapsed) | Male | 62 | 3.00 | 1 | 72 | d-3 to -5 | FC | 2 | N | N | PR |
| 13 | MM (relapsed) | Male | 52 | 8.00 | 2 | 72 | d-3 to -5 | FC | 1 | N | N | CR |
| 14 | MM (relapsed) | Male | 50 | 4.00 | 1 | 24 | d-3 to -5 | FC | 1 | N | N | CR |
| 15 | MM (relapsed) | Female | 48 | 4.00 | 1 | 24 | d-3 to -5 | FC | 1 | N | N | PR |
| 16 | MM (relapsed) | Male | 58 | 4.00 | 1 | 24 | d-3 to -5 | FC | 2 | N | N | PR |
| 17 | MM (refractory) | Female | 60 | 2.00 | / | 5 | d-3 to -5 | FC | 1 | N | N | VGPR |
| 18 | MM (relapsed) | Male | 57 | 4.00 | 1 | 60 | d-3 to -5 | FC | 2 | N | N | sCR |
| 19 | MM (relapsed) | Female | 52 | 5.00 | 3 | 19 | d-3 to -5 | FC | 2 | Y | N | PR |
| 20 | MM (relapsed) | Male | 42 | 3.00 | 1 | 84 | d-3 to -5 | FC | 2 | N | N | PR |
| 21 | MM (relapsed) | Male | 55 | 3.00 | 1 | 24 | d-3 to -5 | FC | 1 | N | N | CR |
| 22 | MM (relapsed) | Male | 57 | 6.00 | 2 | 60 | d-3 to -5 | FC | 1 | N | N | PR |
| 23 | MM (relapsed) | Male | 56 | 3.00 | 1 | 60 | d-3 to -5 | FC | 2 | N | N | VGPR |
| 24 | MM (relapsed) | Male | 65 | 2.00 | 1 | 11 | d-3 to -5 | FC | 1 | N | N | PR |
| 25 | MM (relapsed) | Female | 66 | 4.00 | 1 | 24 | d-3 to -5 | FC | 1 | N | N | PR |
| 26 | MM (relapsed) | Female | 65 | 4.00 | 1 | 118 | d-3 to -5 | FC | 2 | N | N | PR |
| 27 | MM (relapsed) | Female | 57 | 4.00 | 1 | 24 | d-3 to -5 | FC | 1 | Y | N | PR |
| 28 | MM (relapsed) | Male | 52 | 3.00 | 1 | 12 | d-3 to -5 | FC | 2 | N | N | VGPR |
| 29 | MM (relapsed) | Male | 64 | 9.00 | 3 | 132 | d-3 to -5 | FC | 2 | Y | N | PR |
| 30 | MM (relapsed) | Male | 61 | 8.00 | 1 | 84 | d-3 to -5 | FC | 1 | Y | N | PR |
| 31 | MM (relapsed) | Female | 56 | 3.00 | 1 | 24 | d-3 to -5 | FC | 2 | N | N | PR |
| 32 | MM (relapsed) | Female | 65 | 3.00 | 1 | 24 | d-3 to -5 | FC | 2 | N | N | CR |
| 33 | MM (relapsed) | Male | 48 | 6.00 | 1 | 24 | d-3 to -5 | FC | 2 | Y | N | sCR |
| 34 | MM (relapsed) | Male | 59 | 4.00 | 2 | 72 | d-3 to -5 | FC | 2 | Y | N | VGPR |
| 35 | MM (relapsed) | Female | 55 | 5.00 | 1 | 36 | d-3 to -5 | FC | 1 | Y | N | sCR |
| 36 | MM (relapsed) | Male | 72 | 3.00 | 1 | 48 | d-3 to -5 | FC | 1 | N | N | PR |
| 37 | MM (relapsed) | Male | 61 | 7.00 | 1 | 60 | d-3 to -5 | FC | 1 | N | N | PR |
| 38 | MM (relapsed) | Female | 64 | 1.00 | 1 | 12 | d-3 to -5 | FC | 2 | N | N | VGPR |
| 39 | MM (relapsed) | Male | 69 | 5.00 | 1 | 24 | d-3 to -5 | FC | 1 | Y | N | PR |
| 40 | MM (relapsed) | Female | 65 | 4.00 | 1 | 48 | d-3 to -5 | FC | 1 | N | N | PR |
| 41 | MM (relapsed) | Female | 63 | 5.00 | 1 | 24 | d-3 to -5 | FC | 2 | N | N | VGPR |
| 42 | MM (refractory) | Male | 67 | 4.00 | / | 12 | d-3 to -5 | FC | 2 | N | N | sCR |
| 43 | MM (relapsed) | Female | 53 | 3.00 | 1 | 24 | d-3 to -5 | FC | 1 | N | N | PR |
| 44 | MM (refractory) | Female | 63 | 7.00 | / | 48 | d-3 to -5 | FC | 1 | N | N | CR |
| 45 | MM (relapsed) | Female | 56 | 7.00 | 4 | 60 | d-3 to -5 | FC | 1 | N | N | CR |
| 46 | MM (relapsed) | Male | 58 | 7.00 | 4 | 60 | d-3 to -5 | FC | 1 | N | N | PR |
| 47 | MM (relapsed) | Female | 58 | 3.00 | 2 | 36 | d-3 to -5 | FC | 1 | Y | N | SD |
| 48 | MM (relapsed) | Male | 45 | 2.00 | 1 | 21 | d-3 to -5 | FC | 1 | Y | N | SD |
| 49 | MM (relapsed) | Female | 57 | 3.00 | 2 | 4 | d-3 to -5 | FC | 1 | N | N | SD |
| 50 | MM (relapsed) | Female | 55 | 5.00 | 3 | 60 | d-3 to -5 | FC | 1 | Y | N | SD |


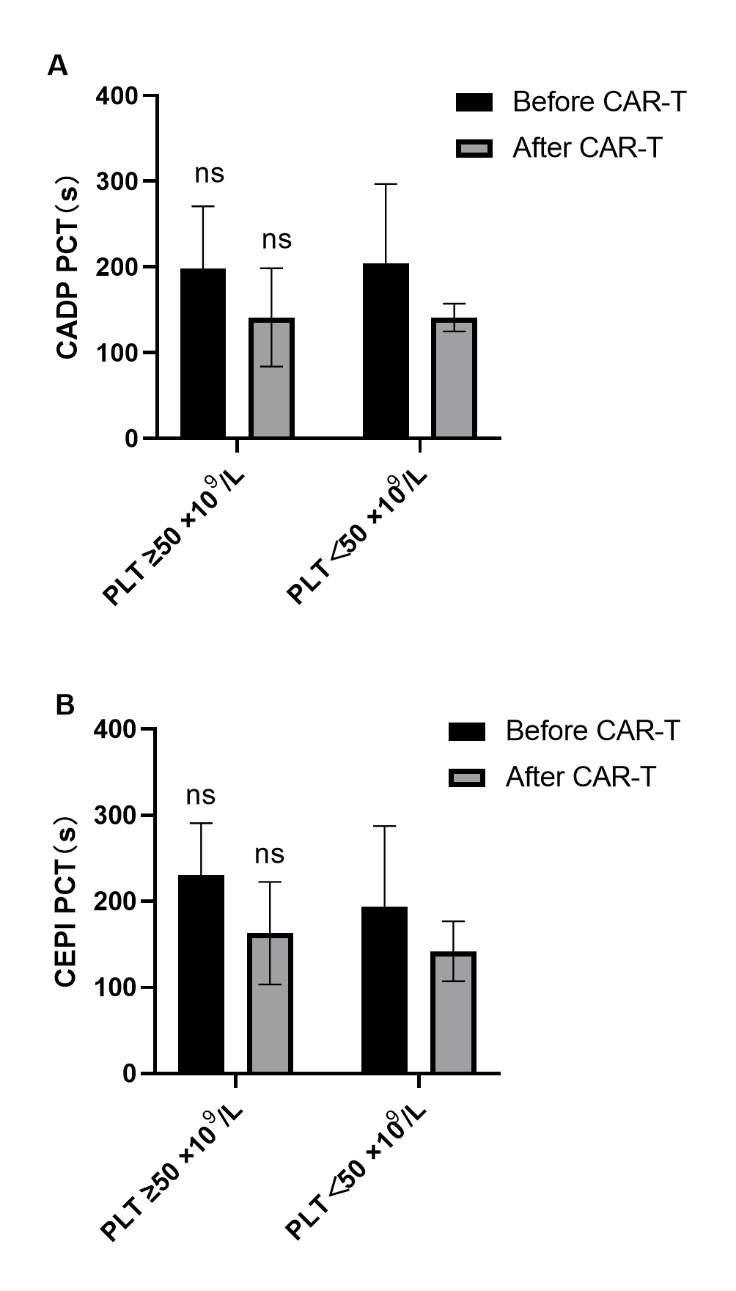


**Supplemental Figure 1**. Comparison of PCTs in patients with R/R MM between ≥ 50 × 109/L group and < 50 × 109/L group. (A) Comparison of CADP PCT in patients with R/R MM between ≥ 50 × 109/L group and < 50 × 109/L group. (B) Comparison of CEPI PCT in patients with R/R MM between ≥ 50 × 109/L group and ≤PR group. Ns means no statistical significance.


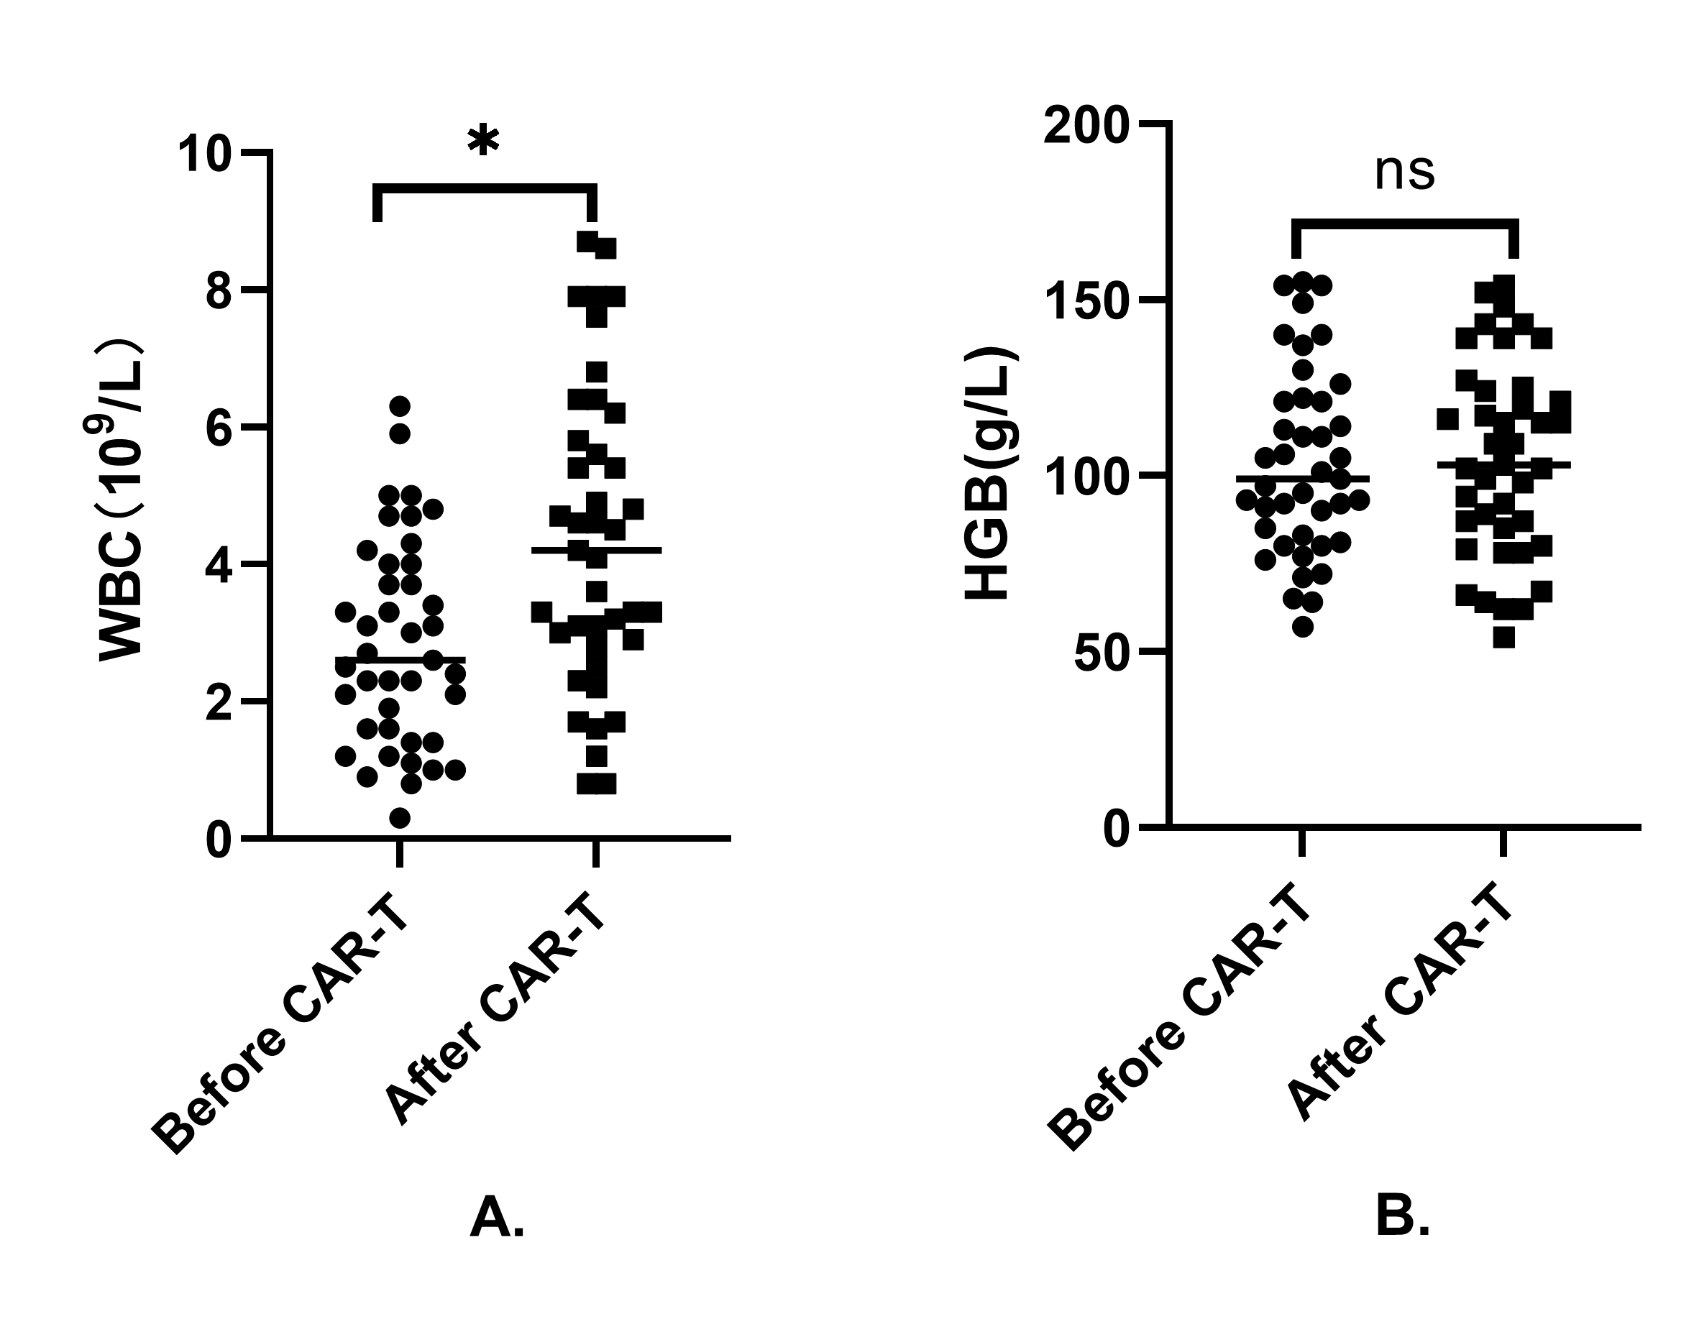


**Supplemental Figure 2**. Comparison of WBC(**A**) and HGB(**B**) levels in patients with R/R MM before and after treatment. **P* < 0.05; ns, no statistical significance.


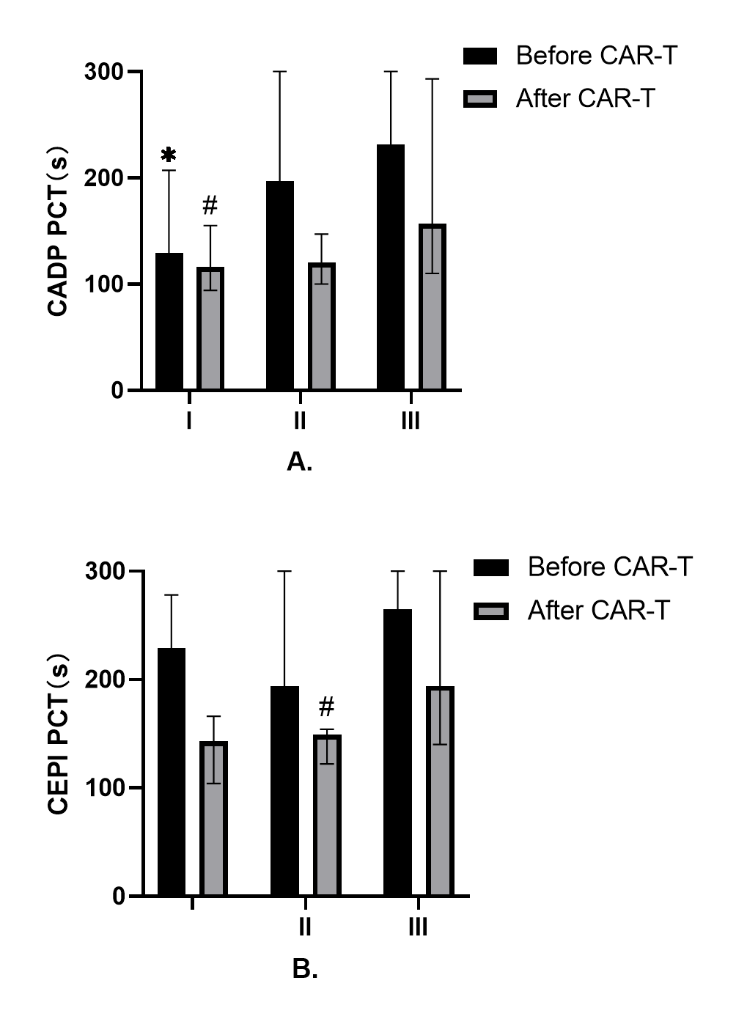


**Supplemental Figure 3**. Comparison of PCTs in patients with R/R MM according to ISS stage. (**A**) Comparison of CADP PCT in patients with R/R MM according to ISS stage. (**B**) Comparison of CEPI PCT in patients with R/R MM according to ISS stage. **P* < 0.05, compared with Grade III stage before CAR-T cell infusion, #*P* < 0.05, compared with Grade III stage after CAR-T cell infusion.


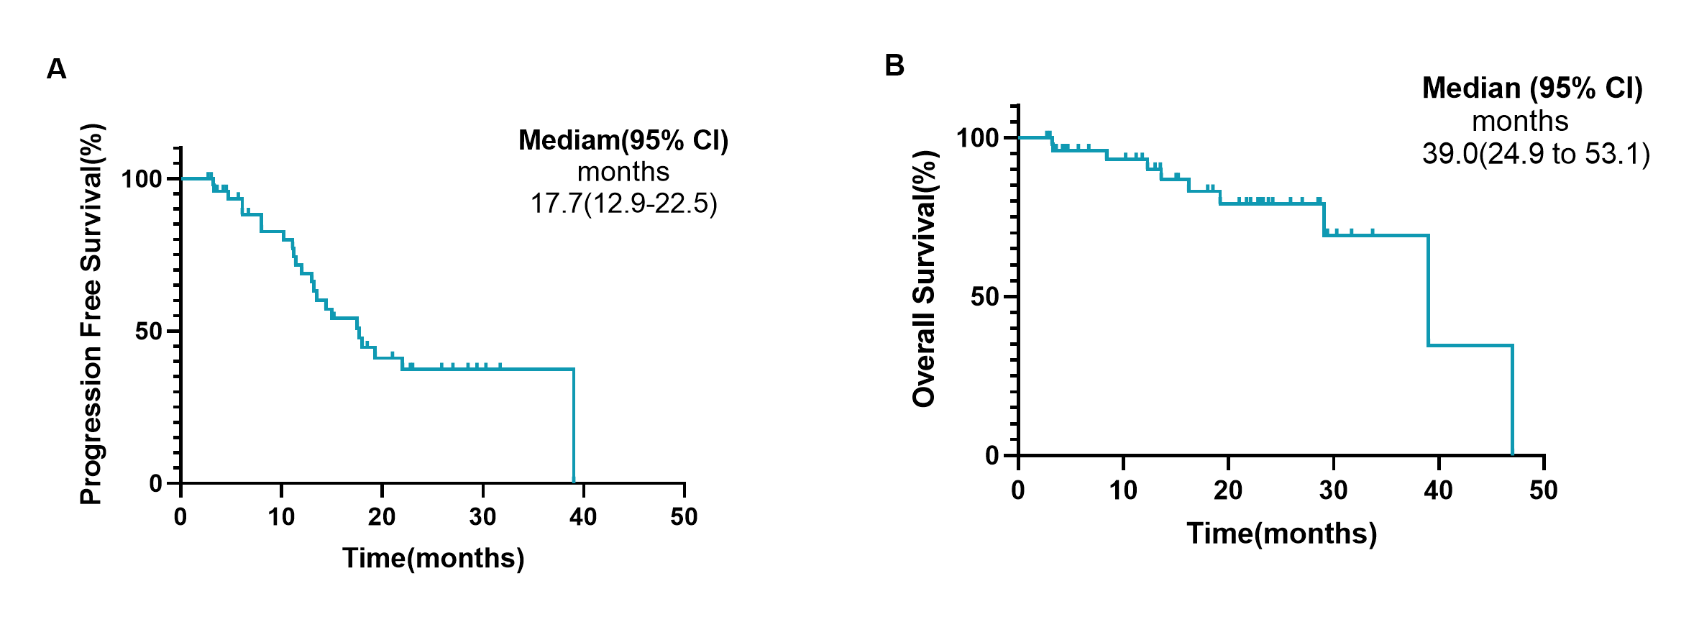


**Supplemental Figure 4**. Progression Free Survival(**A**) and Overall Survival(**B**) of all patients with R/R MM. 95% *CI*: 95% confidence interval. Survival curves were generated according to the Kaplan-Meier method. Log-rank tests were used to compare between-group differences in survival probabilities.


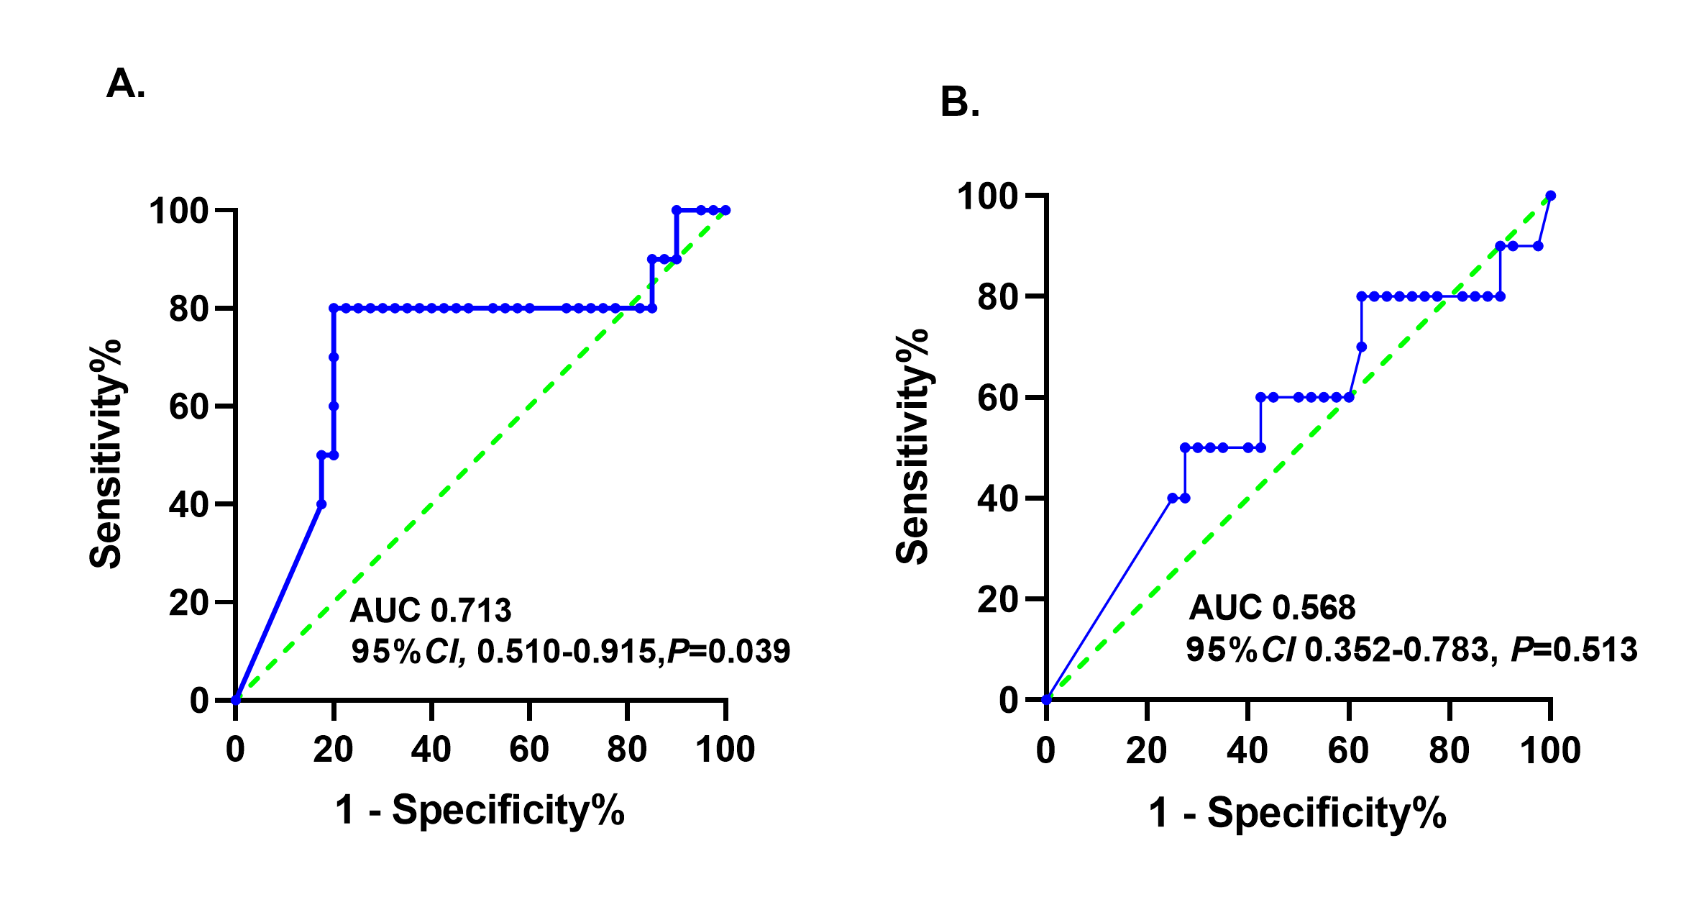


**Supplemental Figure 5.** Receiver operating characteristic (ROC)curve analysis of CADP PCT(**A**) and CEPI PCT(**B**) for the prediction of OS.
